# Supplementary material for: Hidden hotspots of amphibian biodiversity in China
Source: PubMed Central journal article supplement — Proc Natl Acad Sci U S A. 2024 Apr 29;121(20):e2320674121. doi: 10.1073/pnas.2320674121 (PMC11098104; doi:10.1073/pnas.2320674121), 2024-04-29
Supplement: pnas.2320674121.sapp.pdf [file pnas.2320674121.sapp.pdf]

## Supplementary Information for

### Hidden hotspots of amphibian biodiversity in China

#### Author

Wei Xu<sup>1, #</sup>, Yun-He Wu<sup>1, 2, #</sup>, Wei-Wei Zhou<sup>1</sup>, Hong-Man Chen<sup>1</sup>, Bao-Lin Zhang<sup>1</sup>, Jin-Min Chen<sup>1</sup>, Weihua Xu<sup>3</sup>, Ding-Qi Rao<sup>1</sup>, Haipeng Zhao<sup>4</sup>, Fang Yan<sup>1</sup>, Zhiyong Yuan<sup>1</sup>, Ke Jiang<sup>1</sup>, Jie-Qiong Jin<sup>1</sup>, Mian Hou<sup>5</sup>, Dahu Zou<sup>1, 6</sup>, Li-Jun Wang<sup>7</sup>, Yuchi Zheng<sup>8</sup>, Jia-Tang Li<sup>8</sup>, Jianping Jiang<sup>8</sup>, Xiao-Mao Zeng<sup>8</sup>, Youhua Chen<sup>8</sup>, Zi-Yan Liao<sup>8</sup>, Cheng Li<sup>8</sup>, Xue-You Li<sup>1</sup>, Wei Gao<sup>1</sup>, Kai Wang<sup>1, 2</sup>, Dong-Ru Zhang<sup>1</sup>, Chenqi Lu<sup>1, 9</sup>, Tingting Yin<sup>1</sup>, Zhaoli Ding<sup>1</sup>, Gui-Gang Zhao<sup>1</sup>, Jing Chai<sup>1</sup>, Wen-Ge Zhao<sup>10</sup>, Ya-Ping Zhang<sup>1</sup>, John J. Wiens<sup>11, \*</sup>, Jing Che<sup>1, 2, \*</sup>

#### Affiliation

<sup>1</sup>Key Laboratory of Genetic Evolution and Animal Models, and Yunnan Key Laboratory of Biodiversity and Ecological Conservation of Gaoligong Mountain, Kunming Institute of Zoology, Chinese Academy of Sciences, Kunming, Yunnan 650223, China

<sup>2</sup>Southeast Asia Biodiversity Research Institute, Chinese Academy of Sciences, Yezin, Nay Pyi Taw 05282, Myanmar

<sup>3</sup>State Key Laboratory of Urban and Regional Ecology, Research Center for Eco-Environmental Sciences, Chinese Academy of Sciences, Beijing 100085, China

<sup>4</sup>School of Life Sciences, Henan University, Kaifeng, Henan 475004, China

<sup>5</sup>Institute of Continuing Education, Sichuan Normal University, Chengdu, Sichuan 610068, China

<sup>6</sup>College of Science, Tibet University, Lhasa, Tibet 850000, China

<sup>7</sup>School of Life Sciences, Hainan Normal University, Haikou, Hainan 571158, China

<sup>8</sup>Chengdu Institute of Biology, Chinese Academy of Sciences, Chengdu, Sichuan 610041, China

<sup>9</sup>Kunming College of Life Science, University of Chinese Academy of Sciences, Kunming 650204, China

<sup>10</sup>Department of Biology, College of Life and Environment Science, Harbin Normal University, Harbin 150080, China

<sup>11</sup>Department of Ecology and Evolutionary Biology, University of Arizona, Tucson, AZ 85721-0088, USA

#Authors contributed equally to this work

\*Corresponding authors: Jing Che, John J. Wiens

**Email:** chej@mail.kiz.ac.cn; wiensj@arizona.edu

46 **This PDF file includes:**  
47       Supplementary text  
48       Figures S1 to S17  
49       Tables S1 to S5  
50       SI References

51  
52 **Other supplementary materials for this manuscript include the following (in separate files):**  
53

54 **External Dataset S1.** Species list of Chinese amphibians in this study. Names for potential  
55 cryptic species were combined by genus name, MOTU (molecular operational taxonomical unit)  
56 and sample ID. The divergence time, protection status, threat status, and endemism (non-  
57 endemic, endemic to China, or narrowly endemic) for each species is also listed.  
58

59 **External Dataset S2.** Results of species-delimitation analyses. The haplotypes from the *COI*  
60 gene were estimated by DnaSP (see *SI Appendix*, Methods). Haplotypes were then analyzed  
61 using three species delimitation methods (GMYC, ABGD, mPTP). All cryptic species were  
62 named by genus name, MOTU and sample ID. Each family of Chinese amphibians was analyzed  
63 separately.  
64

65 **External Dataset S3.** GenBank accession number of all gene sequences used for phylogeny  
66 reconstruction.  
67

68 **External Dataset S4.** Maximum-likelihood tree for Chinese amphibians and relatives.  
69

70 **External Dataset S5.** Time-calibrated tree used for estimating phylogenetic diversity and  
71 phylogenetic endemism among Chinese amphibians.  
72

73 **External Dataset S6.** Concatenated alignments used for estimating the maximum-likelihood  
74 tree.  
75

76 **External Dataset S7.** Ultrametric and non-ultrametric trees used for species delimitation in each  
77 family.  
78

79 **External Dataset S8.** Species richness, endemism, phylogenetic diversity, and phylogenetic  
80 endemism of each grid cell.  
81

## 82 **Supplementary text**

### 83 **Methods**

#### 84 **Phylogeny Estimation**

85 We estimated a species-level, time-calibrated phylogeny that included most Chinese amphibian  
86 species, in order to calculate spatial patterns of phylogenetic diversity and phylogenetic  
87 endemism. However, the higher-level relationships and divergence times in the tree were  
88 constrained based on previous phylogenomic studies (i.e., relationships among families), and our  
89 analysis primarily estimated relationships and divergence times within and among Chinese  
90 genera. The goal was not to provide a new, global-scale amphibian phylogeny.

91 We selected 12 nuclear genes (*BDNF*, *C-MYC*, *CXCR4*, *H3A*, *NCX1*, *POMC*, *RAG1*,  
92 *RAG2*, *RHOD*, *SIA*, *SLC8A3*, and *TYR*) and 7 mitochondrial genes (12S rRNA, 16S rRNA, *COI*,  
93 *CYTB*, *ND1*, *ND2*, and *ND3*) for estimating the phylogeny. These genes were selected because  
94 they were widely used in large-scale phylogenetic studies of amphibians (1–3). The molecular  
95 dataset included 521 described Chinese amphibian species, 100 potential cryptic Chinese  
96 species, and 1,057 non-Chinese species (External Dataset S3). These closely related non-Chinese  
97 species were included to increase the accuracy of estimated relationships among Chinese species,  
98 but were pruned out of the tree when calculating phylogenetic diversity and phylogenetic  
99 endemism for each grid cell in China (since they do not contribute to phylogenetic diversity and  
100 endemism in China). These closely related species included congeners of the Chinese amphibian  
101 species with available molecular data in GenBank, 1–2 species of other genera in the 13 families  
102 containing Chinese amphibians, and 1–2 species of other families of non-Chinese amphibians.  
103 Species were selected that had the most complete data for the 19 targeted genes. We used the  
104 same non-amphibian outgroups used in Hime et al. (4), including *Anolis carolinensis*, *Chrysemys*  
105 *picta*, *Gallus gallus*, *Homo sapiens*, and *Latimeria chalumnae*.

106 All sequences were aligned using MAFFT (5), which is integrated in FasParser 2.0 (6).  
107 Aligned sequences were then manually inspected for accuracy. We translated nucleotide  
108 sequences to amino acids for protein-coding regions, ensuring that an open reading frame was  
109 maintained. Given their stem and loop secondary structures, the 12S and 16S rRNA sequences  
110 were aligned using accuracy-oriented methods in MAFFT (G-IIS-i, L-INS-i, and E-INS-i) with  
111 slow speed but higher accuracy. The protein-coding genes were aligned by automatically  
112 selecting an appropriate strategy in MAFFT (from among L-INS-i, FFI-NS-i, and FFT-NS-2),  
113 according to the size of the dataset. A maximum-likelihood phylogeny was inferred with IQ-  
114 TREE v2.1.2 (7) using the UFBoot2 ultrafast bootstrapping (8) and SH-aLRT (9) options. We  
115 provided IQ-TREE with initially defined data blocks corresponding to three codon positions for  
116 each protein-coding gene and the full length for ribosomal genes (12S and 16S rRNA). IQ-TREE  
117 determined the optimal partitioning scheme (Table S3) by implementing ModelFinder (10) and  
118 automatically specified the best-fit model for all the partitions (Table S3).

119 We included a backbone family-level tree obtained from Portik et al. (11) and Hime et al.  
120 (4) to constrain the relationships between families and among the three major clades of  
121 amphibians. We extracted one species per family of anurans from the phylogeny of Portik et al.  
122 (11) using the R package *ape* (12), keeping only the topology and excluding branch-length  
123 information. We also extracted one species per family of caudates and gymnophionans from the  
124 phylogeny of Hime et al. (4), along with one species to represent Anura and five outgroup  
125 species. These two topologies were then combined to form a single topology representing all  
126 amphibian families. The topology from Portik et al. (11) was grafted manually into the Anura  
127 position in the phylogeny of Hime et al. (4), with anuran and caudates constrained as sister

128 groups. The combined topology was input into IQ-Tree in order to constrain higher-level  
129 relationships within the estimated species-level phylogeny.

130 The optimal tree inferred from IQ-TREE was then used in estimating divergence times  
131 with treePL v. 1.0 (13). treePL is an implementation of the penalized likelihood method (14) for  
132 very large datasets. Penalized likelihood (14) uses a tree with branch lengths and age constraints  
133 without prior parametric distributions. We utilized treePL because most other approaches to  
134 estimating divergence times (e.g., the uncorrelated lognormal relaxed clock approach in BEAST;  
135 15) would not be practical given the large number of taxa analyzed here. Rather than using fossil  
136 calibration points, we used the results of recent large-scale studies (4, 11) to constrain the  
137 divergence times among families and the three major amphibian clades. These constraints were  
138 put in the configuration file of treePL. Specifically, we set the minimum and maximum  
139 divergence times among families and major clades to equal the estimated age for each of these  
140 clades, using Portik et al. (11) for anurans and Hime et al. (4) for caudates, gymnophionans, and  
141 the major amphibian clades. The treePL analysis was primed to determine optimal settings, and  
142 the tree was then time-calibrated with the thorough setting. We tested eight potential smoothing  
143 parameters (0.0001, 0.001, 0.01, 0.1, 1, 10, 100, 1,000). The best-fit smoothing parameter was  
144 0.0001. The final maximum-likelihood tree and the final time-calibrated tree are available as  
145 External Datasets S4 and S5, respectively. The final concatenated alignment is available as  
146 External Dataset S6. Given the constraints, the higher-level relationships and divergence times  
147 closely matched those estimated by Portik et al. (11) and Hime et al. (4).

148

#### 149 **Cryptic species estimation**

150 We used molecular data to estimate the number of cryptic species present among China's  
151 amphibian species. A total of 2,306 individuals from 313 described species were sampled  
152 through our fieldwork in China, primarily from 2001–2020. Muscle or liver tissues taken from  
153 each individual collected were fixed in 95% ethanol. We performed morphological  
154 identifications according to the amphibian identification keys of Fei et al. (16). All specimens  
155 were initially assigned to a described, morphology-based species. Data were obtained from all  
156 individuals from the mitochondrial cytochrome oxidase (*COI*) gene. Sequences were generated  
157 following laboratory procedures and primers described by Che et al. (17). All newly obtained  
158 sequences were deposited in GenBank (External Dataset S2). We also downloaded 5,177  
159 additional *COI* sequences from 352 described species in GenBank for China's amphibian species  
160 and their congeners (downloaded by the end of 2020). A total of 212 species overlapped between  
161 GenBank and our new data here. However, we added sequences for 101 described species that  
162 were not previously deposited on GenBank. In total, our dataset included 7,483 *COI* sequences  
163 from 453 described Chinese amphibian species, corresponding to an overall coverage of 81.3%  
164 (453/557) of described amphibian species known to occur in China by 2020 (External Dataset  
165 S2). The remaining 18.7% of described species lacked *COI* data, which precluded analysis of  
166 their potential cryptic species. We followed the taxonomy of AmphibiaChina (18) from  
167 December, 2020. Specimen details, including voucher numbers, GenBank accession numbers,  
168 and species-delimitation results are provided in External Dataset S2. Research protocols were  
169 approved by the Ethics Committee of the Kunming Institute of Zoology, Chinese Academy of  
170 Science (IACUC No.: IACUC-OE-2022-07-001).

171 To identify potential cryptic species, we estimated haplotype phylogenies for each of the  
172 amphibian families that occur in China except Cryptobranchidae (see below). We used DnaSP 6

173 (19) to generate haplotypes for *COI* sequences of each family separately (i.e., individuals with  
174 identical haplotypes were amalgamated).

175 We then employed three species-delimitation methods: (i) the Automatic Barcode Gap  
176 Discovery (ABGD) method (20), (ii) the General Mixed Yule Coalescent (GMYC) approach  
177 (21), and (iii) the Multi-rate Poisson Tree Processor (mPTP) method (22). We describe how we  
178 integrated results from the three approaches below. Each method has somewhat different  
179 requirements. The ABGD method requires only haplotype sequences as input. The GMYC  
180 approach requires an ultrametric tree. The mPTP method requires a phylogenetic tree with  
181 branch lengths. Consequently, we utilized BEAST (15) and MrBayes (23) to generate ultrametric  
182 and non-ultrametric trees (respectively) for each family, based on their haplotype sequences.

183 The ultrametric tree for each family was estimated using the uncorrelated lognormal  
184 relaxed molecular-clock model in BEAST 1.8.0 (15). We used the GTR + gamma substitution  
185 model, treating the *COI* gene as a single partition. Markov chains were run for 100 million  
186 generations, sampling every 10,000<sup>th</sup> generation. TRACER 1.7 was used to confirm when the  
187 output reached stationarity (effective sample size >200 for all variables; 24). We initially used  
188 fewer generations and utilized TRACER to evaluate the effective sample size, incrementing the  
189 number of generations if stationarity was not achieved. Ultimately, we used 100 million  
190 generations in for each family to ensure that all of them reached stationarity. Majority-rule  
191 consensus trees were generated using TREEANNOTATOR 1.4.5 (15). Note that each tree was  
192 ultrametric but not time calibrated, and therefore we did not utilize any external calibration  
193 points.

194 The non-ultrametric tree for each family was estimated using MrBayes 3.2.7a (23). We  
195 used the GTR + gamma model with a single partition. The Markov Chains Monte Carlo  
196 (MCMC) chains were run for 10 million generations and sampled every 1,000 generations with a  
197 burn-in of 25%. Both BEAST and MrBayes were implemented using the CIPRES web server  
198 (25). These ultrametric and non-ultrametric trees are available in External Dataset S7.

199 Three species-delimitation methods (GMYC, ABGD, mPTP) were applied to each family  
200 to infer potential species, also referred to as Molecular Operational Taxonomic Units (MOTUs;  
201 26). These three methods are widely used for species delimitation with single-locus data (27).  
202 The ultrametric tree generated from BEAST for each family was used as input in a single-  
203 threshold GMYC analysis in the R package *splits* (28). We performed ABGD on the haplotype  
204 sequences utilizing an online platform (<https://bioinfo.mnhn.fr/abi/public/abgd/abgdweb.html>)  
205 with the default parameters. mPTP was performed on the mPTP webserver (<http://mptp.h-its.org>),  
206 using the non-ultrametric Bayesian tree (from MrBayes) for each family as input.

207 Empirical studies have shown that ABGD tends to undersplit species (29, 30), whereas  
208 GMYC and mPTP tend to oversplit species (29, 31). Combinations of different methods have  
209 been used to overcome these potential biases (27). The individual results of ABGD, mPTP, and  
210 GMYC are presented in detail in External Dataset S2.

211 Potential cryptic species were identified generally following Dincă et al. (32). Each of the  
212 morphology-based species included was classified into one of three categories: “Match”,  
213 “Cryptic species”, and “Merge.” (i) Match: the morphology-based species was supported by the  
214 three methods as a single MOTU. (ii) Cryptic species: one or more of the species-delimitation  
215 methods inferred one or more cryptic species within the morphology-based species (i.e., the  
216 single morphology-based species contained two or more MOTUs). If the three methods agreed  
217 about the number of cryptic species present, then we used that number of potential cryptic  
218 species for further analyses. If the three methods disagreed on the number of cryptic species

219 present within a given morphology-based species then we conservatively utilized the smallest  
220 number of cryptic species inferred among the three methods (including cases in which one  
221 method inferred that no cryptic species were present in the morphology-based species and the  
222 other methods inferred one or more). (iii) Merge: the morphology-based species was assigned to  
223 the same MOTU as another morphology-based species by all three methods. There could be  
224 various reasons why two (or more) morphology-based species were assigned to the same MOTU,  
225 including a recent origin of these lineages, recent introgression of mitochondrial genes, or  
226 problematic morphology-based taxonomy (e.g., 33, 34). Therefore, to be conservative, we  
227 tentatively continued to recognize these morphology-based species for our analyses here. Note  
228 that the species limits (and cryptic species) inferred here were then used in the final time-  
229 calibrated tree among Chinese amphibians.

230 Using combinations of methods to delimit cryptic species has been recommended (e.g.,  
231 27, 35–38). However, given that the putative cryptic species identified here were based only on  
232 mitochondrial DNA, we considered these to be only potential cryptic species. These potential  
233 species should be further investigated with multiple nuclear markers. Many case studies have  
234 found mismatch between species limits from mitochondrial DNA and multi-locus nuclear DNA  
235 (e.g., 39), but there does not seem to be a consensus as to whether mitochondrial DNA  
236 consistently underestimates or overestimates true species numbers. We tried to be conservative  
237 here, by using only the minimum estimated number of cryptic species within a morphology-  
238 based species and by not lumping morphology-based species based on mitochondrial data alone.

239 We had *COI* data for 453 Chinese amphibian species, but there were an additional 104  
240 described species (stopping by the end of 2020) for which we lacked *COI* data. It was important  
241 to make sure that the inferred cryptic species did not belong to these described species to avoid  
242 counting the same species twice in our biodiversity analyses. This determination was made by  
243 initially assigning each potential cryptic species to a morphology-based described species.  
244 Although we did not have *COI* data for every described species, none of the potential cryptic  
245 species should belong to those unsampled described species, based on our initial morphological  
246 identifications. Thus, we conclude that none of the 90 inferred cryptic species belonged to any of  
247 these 104 described morphology-based species. To further test the validity of these cryptic  
248 species, we extracted the divergence time of each cryptic species and described species of  
249 Chinese amphibians from the full tree based on the combined nuclear and mitochondrial data.  
250 We then performed a Wilcoxon rank-sum test in R to determine if there was a statistically  
251 significant difference between the mean ages of each set of species. If no significant difference  
252 was found, it would suggest that these cryptic species are similar in age to the described species,  
253 providing further support for their validity. Conversely, if the cryptic species were significantly  
254 younger, this would suggest that they are less genetically distinct than described species.

### 255 256 **Biogeographic regionalization**

257 We estimated major biogeographic regions based on dissimilarity between each pair of grid cells.  
258 Traditionally, China has been divided into seven zoogeographic regions based on expert opinion  
259 (40): Northeast China, North China, Northwest China, Xizang Plateau, Central China, Southwest  
260 China, and South China. Here, biogeographical regions were delineated among the focal 567 grid  
261 cells based on Simpson's dissimilarity index ( $\beta_{sim}$ ; 41). This index measures pairwise  
262 dissimilarity in species composition among grid cells.  $\beta_{sim}$  is robust to changes in species  
263 richness and can efficiently discriminate species turnover from nestedness (42). We estimated  
264  $\beta_{sim}$  between each pair of grid cells as follows:

265  
266  
267  
268  
269  
270  
271  
272  
273  
274  
275  
276  
277  
278  
279  
280  
281  
282  
283  
284  
285  
286  
287  
288  
289  
290  
291  
292  
293  
294  
295  
296  
297  
298  
299  
300  
301  
302  
303  
304  
305  
306  
307  
308  
309

$$\beta_{\text{sim}} = 1 - \frac{S_{ab}}{\min(S_a, S_b) + S_{ab}}$$

where  $S_{ab}$  is the number of species that co-occur in these two grid cells, and  $S_a$  and  $S_b$  are the number of species unique to each grid cell. Estimation was performed using the R package *vegan* (43).

We applied the unweighted pair-group method using arithmetic averages (UPGMA) to the dissimilarity matrix (44). A UPGMA dendrogram displays relationships among grid cells and has good performance across datasets (44). We then used the *GMD* package in R (45) to determine optimal K clusters on the UPGMA dendrogram. A suitable cut-off point was chosen based on the best K value.

## Results

### Summary of cryptic species estimation

Overall, the species-delimitation analyses conservatively estimated 90 cryptic species among the 453 described Chinese species with *COI* data (External Dataset S2; Table S4). We identified 73 potential cryptic species from our new *COI* sequence data and another 17 potential cryptic species from published *COI* sequences. Among the 90 cryptic species identified (External Dataset S2), 27 cryptic species were consistent with other studies that applied species-delimitation methods to 16S rRNA data (*Megophrys* and *Leptobranchella*; 46–48; *Rhacophorus rhodopus*, 49) and to 16S rRNA, *COI*, and *ND2* data (*Amolops*; 50).

In addition to these 90 cryptic species identified here, 10 cryptic species reported by previous studies were also included in our analysis (External Dataset S1). For example, six cryptic species within *Andrias davidianus* (Cryptobranchidae) were identified by both genomic data and mtDNA markers, including *COI* sequences (51). We estimated the total number of morphologically cryptic species in China (not described before the end of 2020) to be 100 (External Dataset S2; Table S4). We also found that 14 morphology-based Chinese species were inferred to be conspecific with other morphology-based species based on these analyses (labeled as “Merge” in the External Dataset S2; Table S4). However, we do not support synonymizing these species without additional testing.

We found potential cryptic species of Chinese amphibians in all families except for Bombinatoridae, Ceratobatrachidae, Hylidae, Hynobiidae, and Ichthyophiidae (External Dataset S2; Table S4). The most cryptic diversity was found in Megophryidae with 56 cryptic species (56.0% of all cryptic species). There were 31 cryptic species in the genus *Megophrys* alone. Previous studies have also suggested the existence of many cryptic species in this genus (46, 48). The family with the second highest number of cryptic species was Ranidae ( $n=12$  cryptic species). The other families with cryptic species were Rhacophoridae ( $n=10$  cryptic species), Bufonidae ( $n=6$ ), Salamandridae ( $n=6$ ), Cryptobranchidae ( $n=6$ ), Dicroglossidae ( $n=3$ ), and Microhylidae ( $n=1$ ).

Using the time-calibrated tree based on nuclear and mitochondrial data for all Chinese amphibians, we found no significant difference in mean ages of cryptic species and described species (6.94 Ma vs. 7.68 Ma; Wilcoxon rank sum test,  $P=0.2033$ ; External Dataset 1). There was extensive overlap in the ages of the described and cryptic species (Fig. S1), strongly suggesting that the cryptic species inferred here tend to be roughly as divergent as described species.

### Biogeographic regions

310 UPGMA clustering analysis of these 567 grid cells and 647 species identified eight large-scale  
311 biogeographic regions (Fig. S3a). These were different from the seven Chinese zoogeographic  
312 regions (Fig. S3b) defined by Zhang (40). In general, our results showed an increased number of  
313 regions delimited in western China, with fewer regions delimited in the east and north. Species  
314 richness (Fig. 2a), endemism (Fig. 2b), phylogenetic diversity (Fig. 2c) and phylogenetic  
315 endemism (Fig. 2d) were mapped on these grid cells. Among these regions, South China had  
316 exceptionally high species richness and phylogenetic diversity (Table S5). After correcting for  
317 the number of grid cells, the South Yunnan Mountains, Himalayas, Yunnan Plateau, Hengduan  
318 Mountains, and South China had higher richness than the other regions (Table S5). Areas with  
319 high endemism (Fig. 2b) and phylogenetic endemism (Fig. 2d) included South China, South  
320 Yunnan Mountains, Yunnan Plateau, and the Himalayas.

321



322 **References**

- 323 1. R. A. Pyron, J. J. Wiens, A large-scale phylogeny of Amphibia including over 2800 species,  
324 and a revised classification of extant frogs, salamanders, and caecilians. *Mol. Phylogenet.*  
325 *Evol.* **61**, 543–583 (2011).
- 326 2. R. A. Pyron, Biogeographic analysis reveals ancient continental vicariance and recent oceanic  
327 dispersal in amphibians. *Syst. Biol.* **63**, 779–797 (2014).
- 328 3. W. Jetz, R. A. Pyron, The interplay of past diversification and evolutionary isolation with  
329 present imperilment across the amphibian tree of life. *Nat. Ecol. Evol.* **2**, 850–858 (2018).
- 330 4. P. M. Hime *et al.*, Phylogenomics reveals ancient gene tree discordance in the amphibian tree  
331 of life. *Syst. Biol.* **70**, 49–66 (2021).
- 332 5. K. Katoh, D. M. Standley, MAFFT multiple sequence alignment software version 7:  
333 improvements in performance and usability. *Mol. Biol. Evol.* **30**, 772–780 (2013).
- 334 6. Y. B. Sun, FasParser2: A graphical platform for batch manipulation of tremendous amount of  
335 sequence data. *Bioinformatics* **34**, 2493–2495 (2018).
- 336 7. B. Q. Minh *et al.*, IQ-TREE 2: new models and efficient methods for phylogenetic inference  
337 in the genomic era. *Mol. Biol. Evol.* **37**, 1530–1534 (2020).
- 338 8. D. T. Hoang, O. Chernomor, A. von Haeseler, B. Q. Minh, L. S. Vinh, UFBoot2: Improving  
339 the Ultrafast Bootstrap Approximation. *Mol. Biol. Evol.* **35**, 518–522 (2018).
- 340 9. S. Guindon *et al.*, New algorithms and methods to estimate maximum-likelihood phylogenies:  
341 assessing the performance of PhyML 3.0. *Syst. Biol.* **59**, 307–321 (2010).
- 342 10. S. Kalyaanamoorthy, B. Q. Minh, T. K. F. Wong, A. von Haeseler, L. S. Jermin,  
343 ModelFinder: fast model selection for accurate phylogenetic estimates. *Nat. Methods.* **14**,  
344 587–589 (2017).
- 345 11. D. M. Portik, J. W. Streicher, J. J. Wiens, Frog phylogeny: A time-calibrated, species-level  
346 tree based on hundreds of loci and 5,242 species. *Mol. Phylogenet. Evol.* **188**, 107907  
347 (2023).
- 348 12. E. Paradis, K. Schliep, ape 5.0: an environment for modern phylogenetics and evolutionary  
349 analyses in R. *Bioinformatics* **35**, 526–528 (2019).
- 350 13. S. A. Smith, B. C. O’Meara, treePL: Divergence time estimation using penalized likelihood  
351 for large phylogenies. *Bioinformatics* **28**, 2689–2690 (2012).
- 352 14. M. J. Sanderson, Estimating absolute rates of molecular evolution and divergence times: A  
353 penalized likelihood approach. *Mol. Biol. Evol.* **19**, 101–109 (2002).
- 354 15. A. J. Drummond, A. Rambaut, BEAST: Bayesian evolutionary analysis by sampling trees.  
355 *BMC Evol. Biol.* **7**, 1–8 (2007).
- 356 16. L. Fei *et al.*, (2009) Fauna Sinica, Amphibia. Anura, vol. 2. Science Press, Beijing (in  
357 Chinese).
- 358 17. J. Che *et al.*, Universal COI primers for DNA barcoding amphibians. *Mol. Ecol. Resour.* **12**,  
359 247–258 (2012).
- 360 18. AmphibiaChina, 2020. The database of China’s amphibians. Electronic Database accessible  
361 at <http://www.amphibiachina.org/>. Kunming Institute of Zoology (CAS), Kunming,  
362 Yunnan, China.
- 363 19. J. Rozas *et al.*, DnaSP 6: DNA sequence polymorphism analysis of large data sets. *Mol. Biol.*  
364 *Evol.* **34**, 3299–3302 (2017).
- 365 20. N. Puillandre, A. Lambert, S. Brouillet, G. J. M. E. Achaz, ABGD, Automatic Barcode Gap  
366 Discovery for primary species delimitation. *Mol. Ecol.* **21**, 1864–1877 (2012).

- 367 21. J. Pons *et al.*, Sequence-based species delimitation for the DNA taxonomy of undescribed  
368 insects. *Syst. Biol.* **55**, 595–609 (2006).
- 369 22. P. Kapli *et al.*, Multi-rate Poisson tree processes for single-locus species delimitation under  
370 maximum likelihood and Markov chain Monte Carlo. *Bioinform.* **33**, 1630–1638 (2017).
- 371 23. F. Ronquist *et al.*, MrBayes 3.2: efficient Bayesian phylogenetic inference and model choice  
372 across a large model space. *Syst. Biol.* **61**, 539–542 (2012).
- 373 24. A. Rambaut, A. J. Drummond, D. Xie, G. Baele, M. A. Suchard, Posterior summarization in  
374 Bayesian phylogenetics using Tracer 1.7. *Syst. Biol.* **67**, 901–904 (2018).
- 375 25. M. A. Miller, W. Pfeiffer, T. Schwartz, Creating the CIPRES Science Gateway for inference  
376 of large phylogenetic trees. In: Gateway Computing Environments Workshop (GCE), IEEE,  
377 pp. 1–8 (2010).
- 378 26. M. Blaxter *et al.*, Defining operational taxonomic units using DNA barcode data. *Philos.*  
379 *Trans. R. Soc. B: Biol. Sci.* **360**, 1935–1943 (2005).
- 380 27. A. Luo, C. Ling, S. Y. Ho, C. D. Zhu, Comparison of methods for molecular species  
381 delimitation across a range of speciation scenarios. *Syst. Biol.* **67**, 830–846 (2018).
- 382 28. T. Ezard, T. Fujisawa, T. G. Barraclough (2009) splits: Species' Limits by Threshold  
383 Statistics. R package version 1.0-14/r31. <http://R-Forge.R-project.org/projects/splits/>.
- 384 29. M. Pentinsaari, R. Vos, M. Mutanen, Algorithmic single-locus species delimitation: effects  
385 of sampling effort, variation and nonmonophyly in four methods and 1870 species of  
386 beetles. *Mol. Ecol. Resour.* **17**, 393–404 (2017).
- 387 30. M. A. Renner, M. M. Heslewood, S. D. Patzak, A. Schäfer-Verwimp, J. Heinrichs, By how  
388 much do we underestimate species diversity of liverworts using morphological evidence?  
389 An example from Australasian *Plagiochila* (Plagiochilaceae: Jungermanniopsida). *Mol.*  
390 *Phylogenet. Evol.* **107**, 576–593 (2017).
- 391 31. A. Paz, A. J. Crawford, Molecular-based rapid inventories of sympatric diversity: a  
392 comparison of DNA barcode clustering methods applied to geography-based vs clade-based  
393 sampling of amphibians. *J. Biosci.* **37**, 887–896 (2012).
- 394 32. V. Dincă *et al.*, DNA barcode reference library for Iberian butterflies enables a continental-  
395 scale preview of potential cryptic diversity. *Sci. Rep.* **5**, 12395 (2015).
- 396 33. Y. H. Wu *et al.*, DNA barcoding of Chinese snakes reveals hidden diversity and conservation  
397 needs. *Mol. Ecol. Resour.* **23**, 1124–1141 (2023).
- 398 34. Y. Shen Y *et al.*, DNA barcoding the ichthyofauna of the Yangtze River: Insights from the  
399 molecular inventory of a mega-diverse temperate fauna. *Mol. Ecol. Resour.* **19**, 1278–1291  
400 (2019).
- 401 35. M. Kekkonen, P. D. N. Hebert, DNA barcode-based delineation of putative species: Efficient  
402 start for taxonomic workflows. *Mol. Ecol. Resour.* **14**, 706–715 (2014).
- 403 36. M. Kekkonen, M. Mutanen, L. Kaila, M. Nieminen, P. D. N. Hebert, Delineating species  
404 with DNA barcodes: A case of taxon dependent method performance in moths. *PLoS One*  
405 **10**, e0122481 (2015).
- 406 37. Q. Li *et al.*, DNA barcoding subtropical aphids and implications for population  
407 differentiation. *Insects* **11**, 11 (2019).
- 408 38. G. Limmon *et al.*, Assessing species diversity of Coral Triangle artisanal fisheries: A DNA  
409 barcode reference library for the shore fishes retailed at Ambon harbor (Indonesia). *Ecol.*  
410 *Evol.* **10**, 3356–3366 (2020).

- 411 39. Z. Y. Yuan *et al.*, Historical mitochondrial genome introgression confounds species  
412 delimitation: evidence from phylogenetic inference in the *Odorrana grahami* species  
413 complex. *Curr. Zool.* **69**, 82–90 (2023).
- 414 40. R. Zhang, China animal geography. Science Press, Beijing (1999).
- 415 41. G. G. Simpson, Mammals and the nature of continents. *Am. J. Sci.* **241**, 1–31 (1943).
- 416 42. A. Baselga, Partitioning the turnover and nestedness components of beta diversity. *Glob.*  
417 *Ecol. Biogeogr.* **19**, 134–143 (2010).
- 418 43. J. Oksanen *et al.*, vegan: community ecology package. R package version 2.3-2 (2015).
- 419 44. H. Kreft, W. Jetz, A framework for delineating biogeographical regions based on species  
420 distributions. *J. Biogeogr.* **37**, 2029–2053 (2010).
- 421 45. X. Zhao, E. Valen, B. J. Parker, A. Sandelin, Systematic clustering of transcription start site  
422 landscapes. *PLoS One* **6**, e23409 (2011).
- 423 46. J. M. Chen *et al.*, A novel multilocus phylogenetic estimation reveals unrecognized diversity  
424 in Asian horned toads, genus *Megophrys* sensu lato (Anura: Megophryidae). *Mol.*  
425 *Phylogenet. Evol.* **106**, 28–43 (2017).
- 426 47. J. M. Chen *et al.*, Large-scale phylogenetic analyses provide insights into unrecognized  
427 diversity and historical biogeography of Asian leaf-litter frogs, genus *Leptolalax* (Anura:  
428 Megophryidae). *Mol. Phylogenet. Evol.* **124**, 162–171 (2018).
- 429 48. Z. Liu *et al.*, Prevalence of cryptic species in morphologically uniform taxa—Fast speciation  
430 and evolutionary radiation in Asian frogs. *Mol. Phylogenet. Evol.* **127**, 723–731 (2018).
- 431 49. K. O. Chan, L. L. Grismer, R. M. Brown, Comprehensive multi-locus phylogeny of Old  
432 World tree frogs (Anura: Rhacophoridae) reveals taxonomic uncertainties and potential  
433 cases of over- and underestimation of species diversity. *Mol. Phylogenet. Evol.* **127**, 1010–  
434 1019 (2018).
- 435 50. Y. H. Wu *et al.* A combined approach of mitochondrial DNA and anchored nuclear  
436 phylogenomics sheds light on unrecognized diversity, phylogeny, and historical  
437 biogeography of the torrent frogs, genus *Amolops* (Anura: Ranidae). *Mol. Phylogenet. Evol.*  
438 **148**, 106789 (2020).
- 439 51. F. Yan *et al.*, The Chinese giant salamander exemplifies the hidden extinction of cryptic  
440 species. *Curr. Biol.* **28**, R590–R592 (2018).
- 441 52. L. Revell, phytools 2.0: an updated R ecosystem for phylogenetic comparative methods (and  
442 other things). *PeerJ.* **12**, e16505 (2024).
- 443 53. O. Venter *et al.*, Sixteen years of change in the global terrestrial human footprint and  
444 implications for biodiversity conservation. *Nat. Commun.* **7**, 1–11 (2016).
- 445 54. J. Soubrier *et al.*, The influence of rate heterogeneity among sites on the time dependence of  
446 molecular rates. *Mol. Biol. Evol.* **29**, 3345–3358 (2012).
- 447

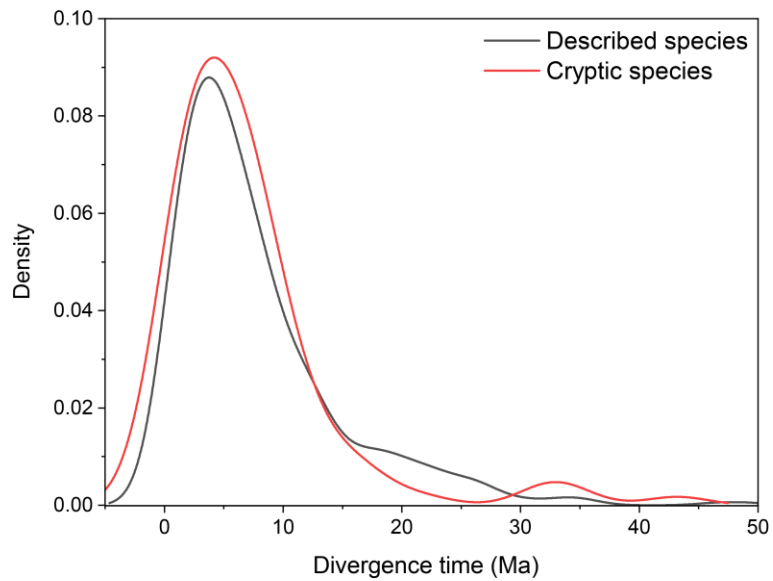

448  
449

450 **Fig. S1. Comparison of ages of described and cryptic species.** This figure displays the kernel  
451 density of estimated ages of cryptic species (red) and described species (black) of Chinese  
452 amphibians. Ages for each species were extracted from the time-calibrated tree based on both  
453 nuclear and mitochondrial data. Data for each species are given in Dataset S1.  
454

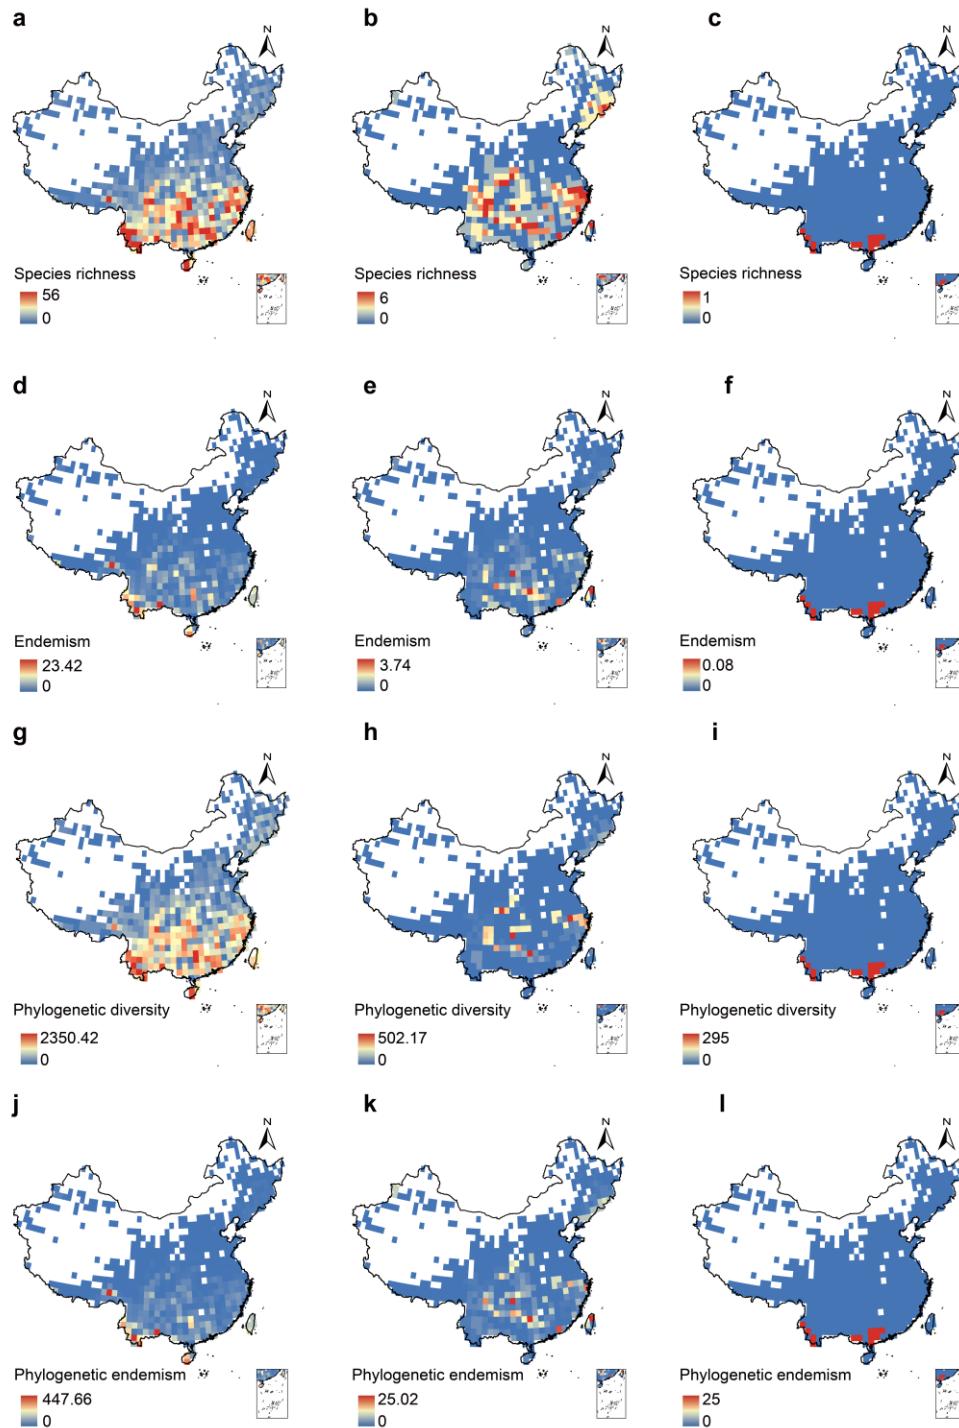

455  
456  
457  
458  
459  
460  
461  
462

**Fig. S2. Diversity patterns in Chinese amphibians shown separately for each of the three major clades.** Patterns are shown for frogs (a, d, g, j) salamanders (b, e, h, k), and caecilians (c, f, i, l). Spatial patterns are shown for species richness (a–c), weighted species endemism (d–f), phylogenetic diversity (g–i), and phylogenetic endemism (j–l). The white grid cells lacked recorded amphibian species and were excluded from the analyses.

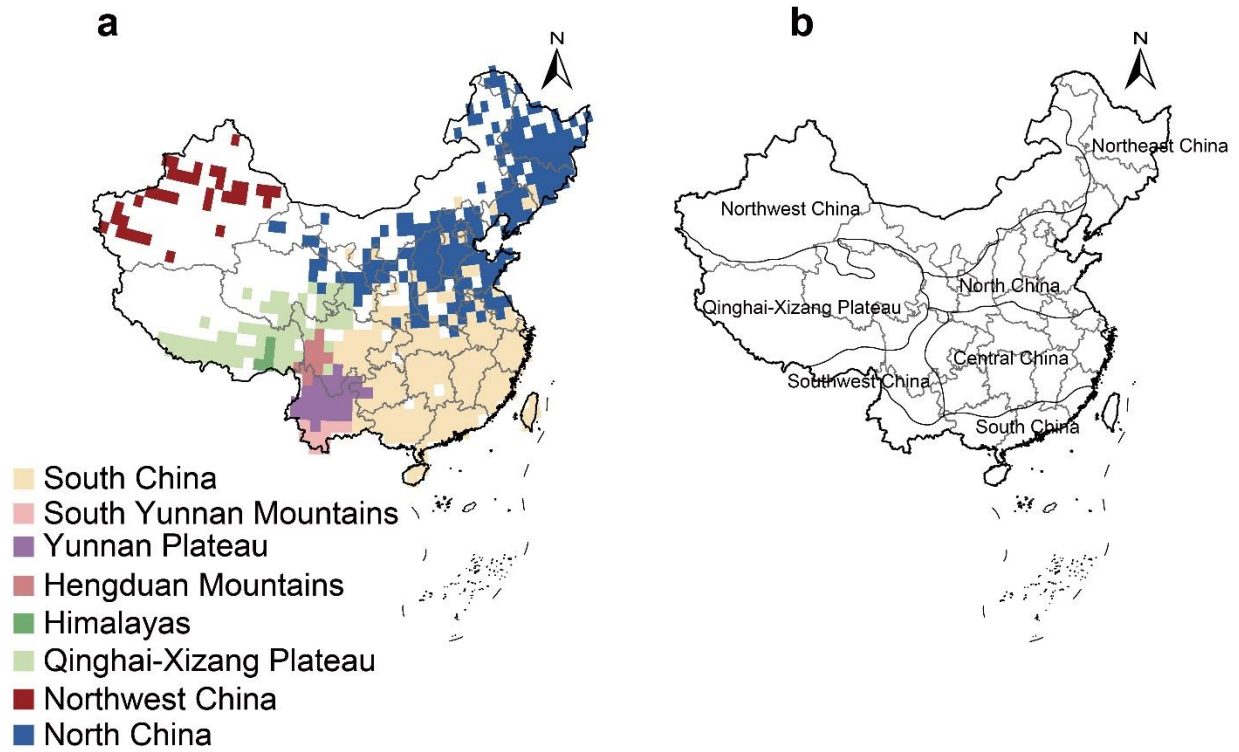

463

464 **Fig. S3. Eight biogeographic regions delimited by UPGMA clustering in this study (a) and**  
 465 **seven zoogeographic regions (b) modified from Zhang (40).** The gray lines indicate the  
 466 provincial boundaries of China.

467

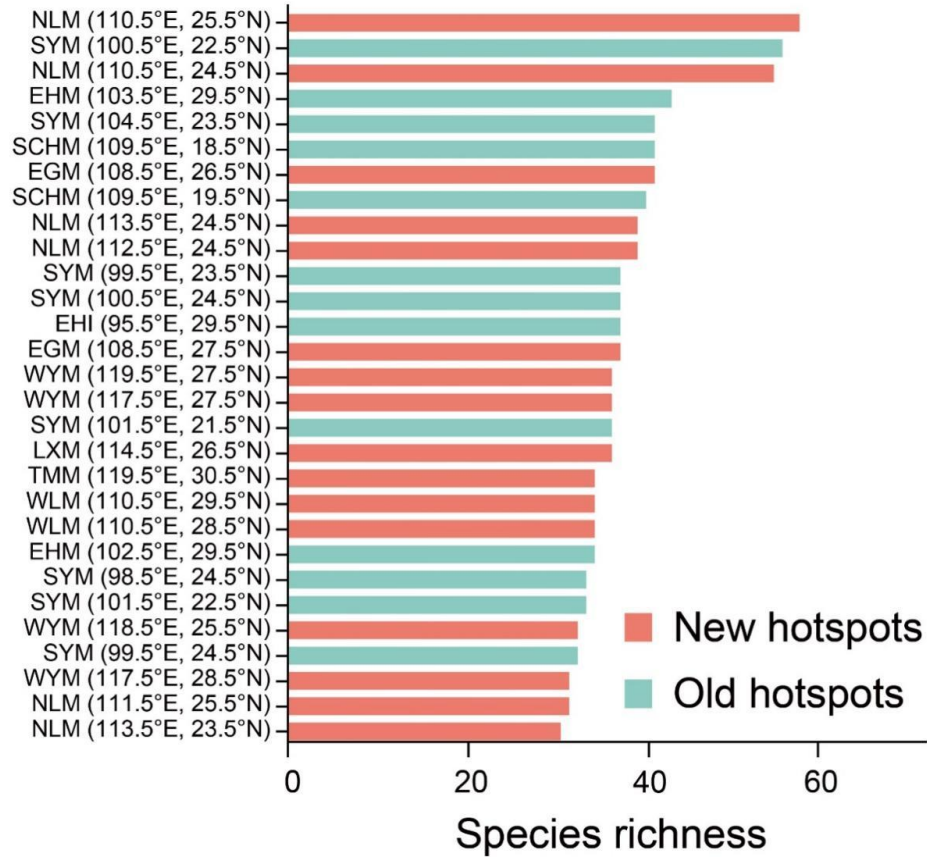

468  
 469  
 470  
 471  
 472  
 473  
 474  
 475  
 476

**Fig. S4. Total species richness of each grid cell in the ten hotspots.** The longitude and latitude of the centroid of each grid cell are shown in the brackets. The 10 geographically distinct biodiversity hotspots are: Eastern Himalayas (EHI), Eastern Hengduan Mountains (EHM), Southwest Yunnan Mountains (SYM), South-Central Hainan Mountains (SCHM), Nanling Mountains (NLM), Wuling Mountains (WLM), Eastern Guizhou Mountains (EGM), Luoxiao Mountains (LXM), Wuyi Mountains (WYM), and Tianmu Mountains (TMM).

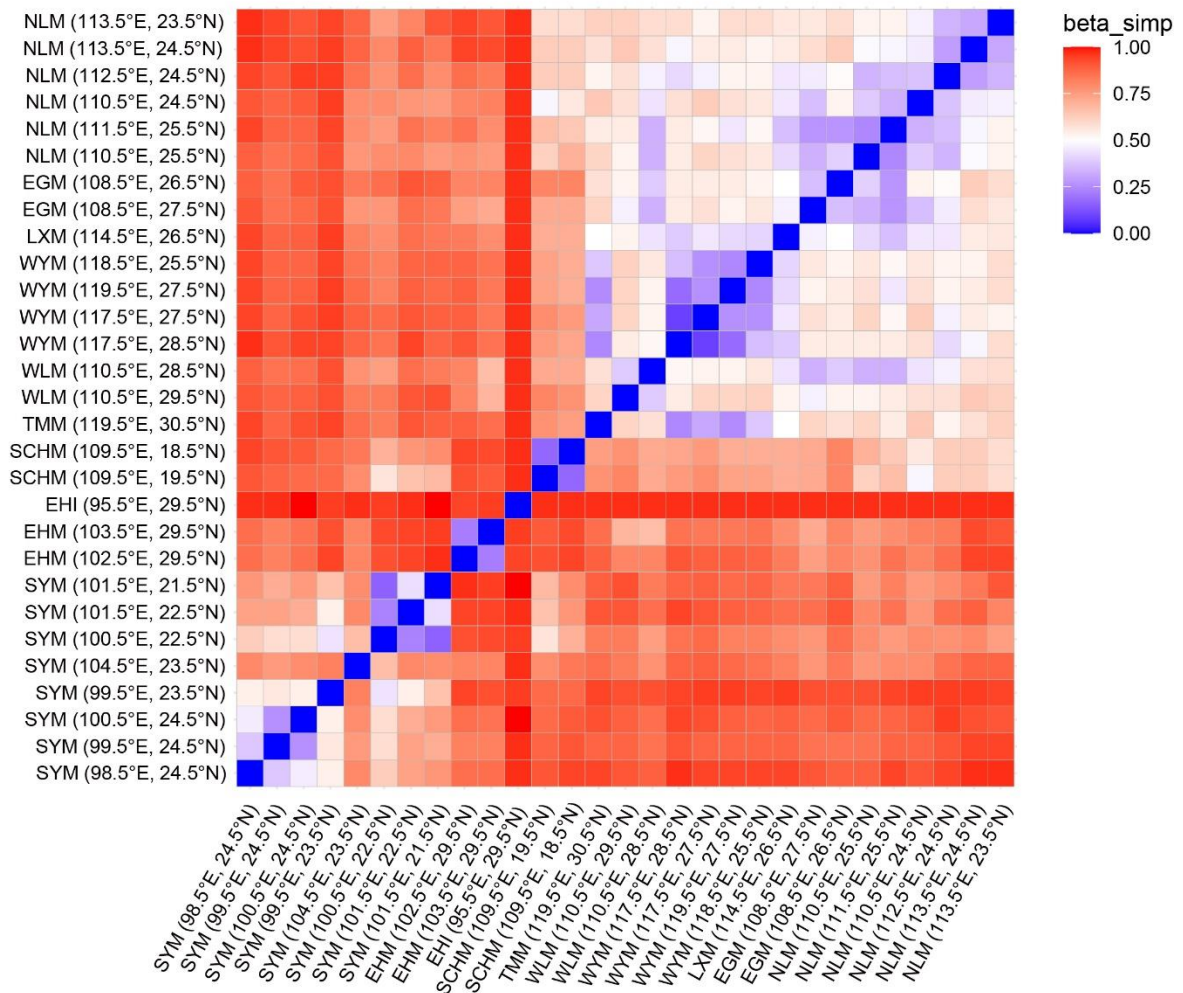

477

478

479

480

481

482

483

484

485

486

487

**Fig. S5. Beta-Simpson values for each of the 29 most species rich grid cells.** Higher values indicate larger differences in species composition between pairs of grid cells. The name of each grid cell consists of the abbreviation of the hotspot it is contained in and the longitude and latitude of the center of the grid cell. The 10 hotspots are: EHI: Eastern Himalayas (old hotspots), EHM: Eastern Hengduan Mountains (old hotspot), SYM: Southwest Yunnan Mountains (old hotspot), SCHM: South-Central Hainan Mountains (old hotspot), NLM: Nanling Mountains (new hotspot), WLM: Wuling Mountains (new hotspot), EGM: Eastern Guizhou Mountains (new hotspots), LXM: Luoxiao Mountains (new hotspot), WYM: Wuyi Mountains (new hotspots), TMM: Tianmu Mountains (new hotspot).



488  
489

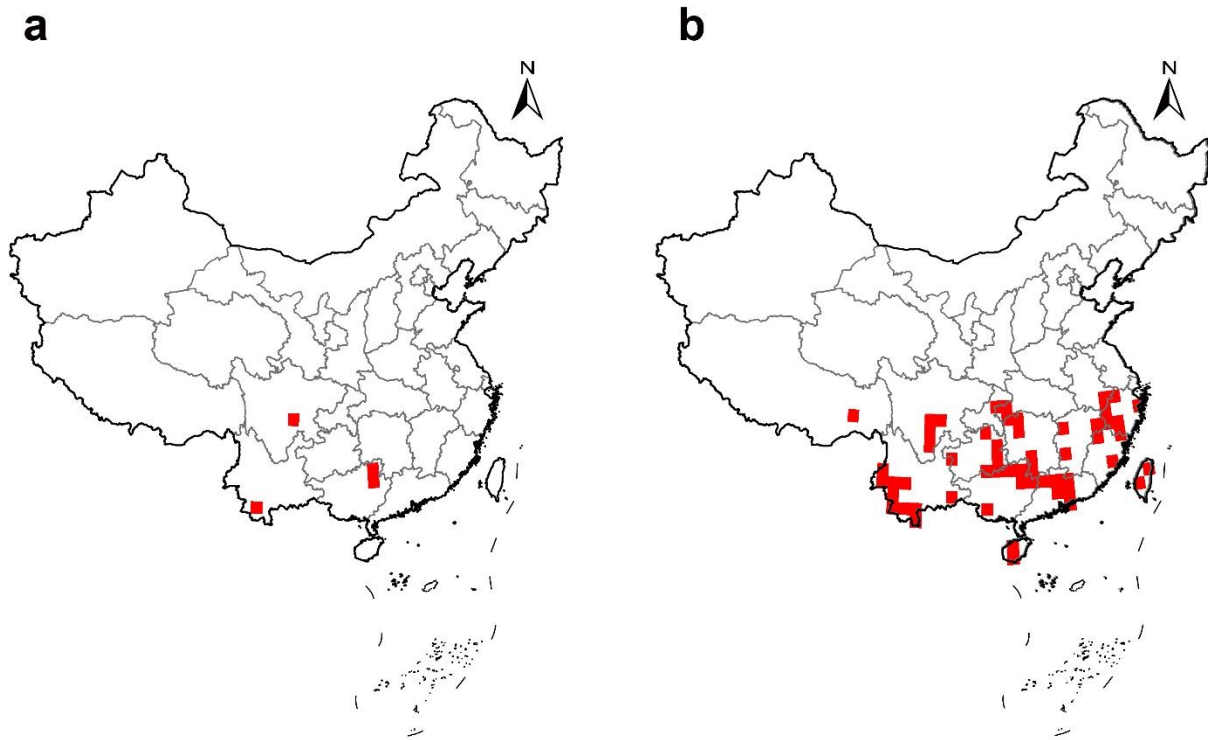

490  
491  
492  
493  
494  
495

**Fig. S6. The most species-rich grid cells under two alternative thresholds.** The red color shows the most species-rich grid cells based on the upper 99<sup>th</sup> percentile for species richness (a), and the 90<sup>th</sup> percentile (b). The gray lines indicate the provincial boundaries of China.

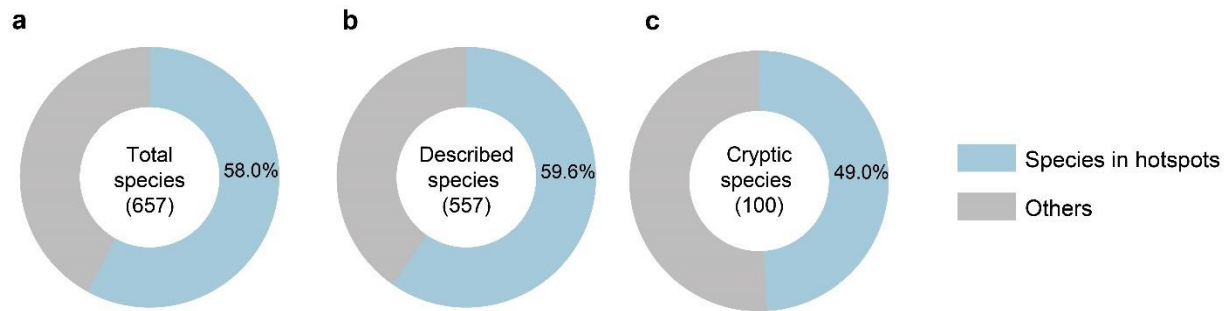

496  
497

498 **Fig. S7. Distribution of species among hotspot and non-hotspot grid cells.** (a) Total species.  
499 (b) Described species. (c) Cryptic species.

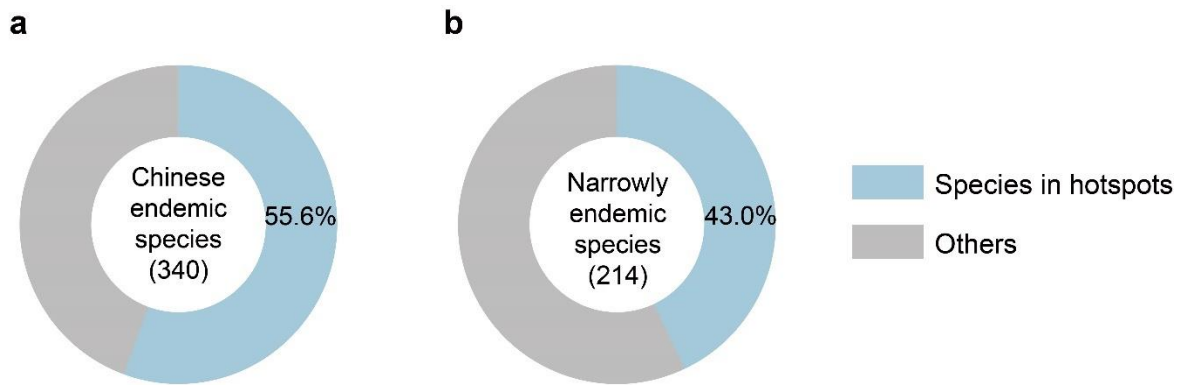

500  
 501  
 502  
 503  
 504

**Fig. S8. Distribution of endemic Chinese species among hotspot and non-hotspot grid cells.**  
 (a) Species endemic to China. (b) Narrowly endemic species (distribution limited to a single grid cell).

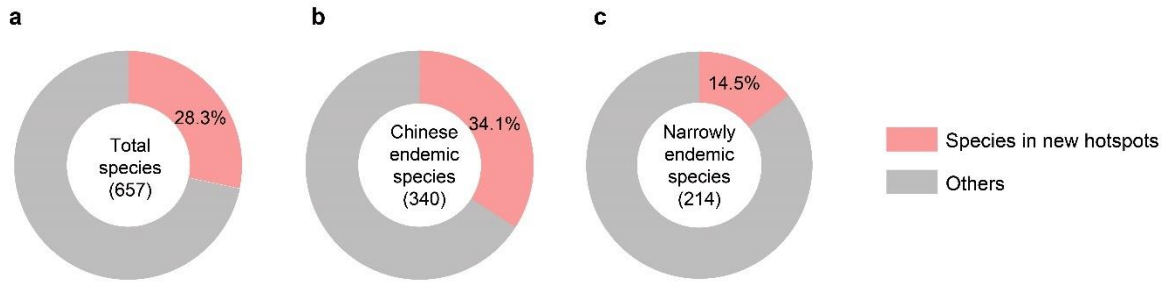

505  
506  
507

**Fig. S9. Distribution of species among the six new hotspots and other areas.**

508

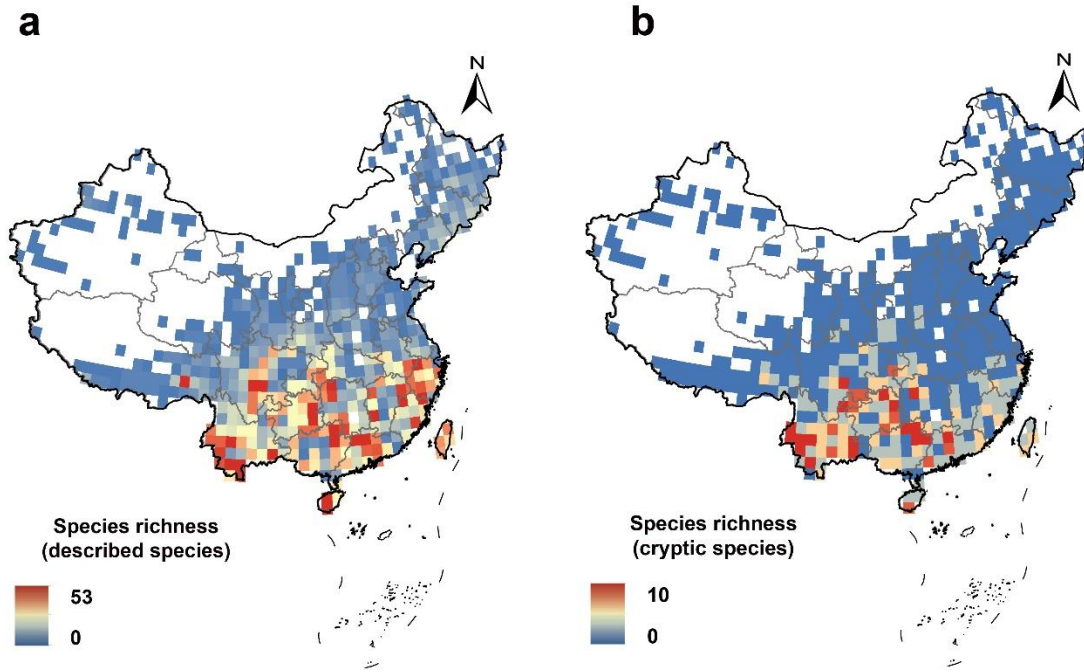

509

510

511 **Fig. S10. Spatial richness patterns of described species (a) and cryptic species (b).** The gray

512 lines indicate the provincial boundaries of China.

513

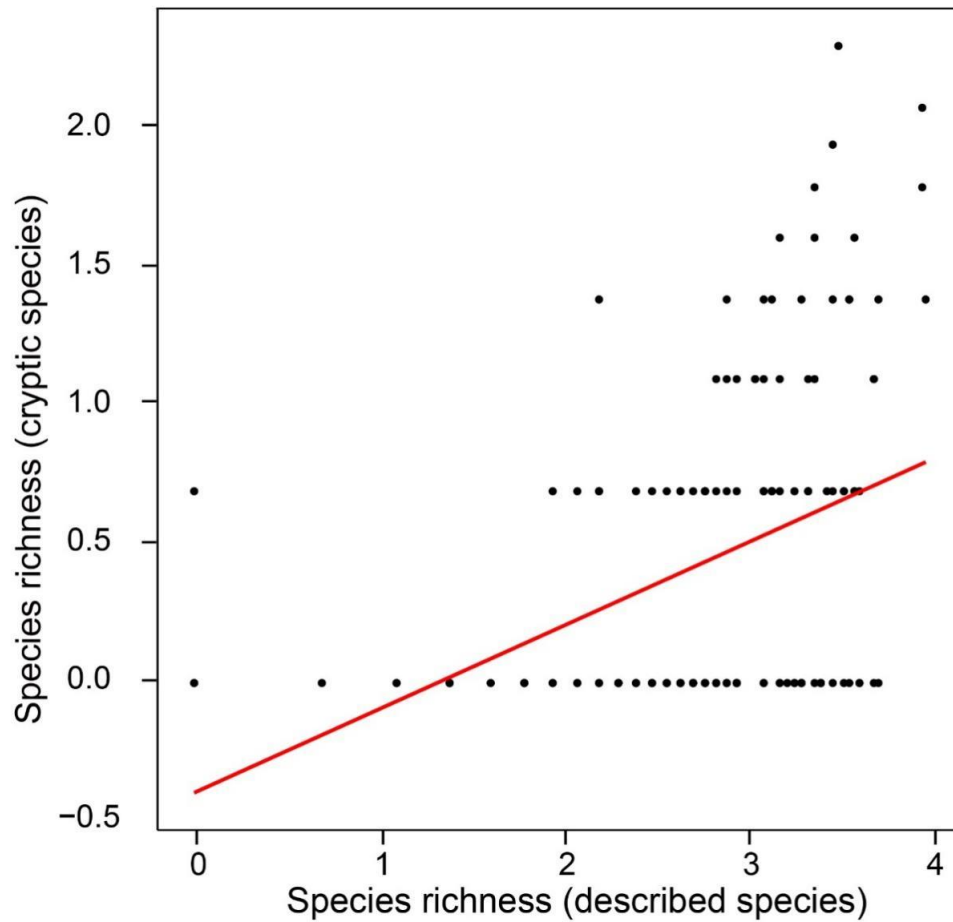

515  
 516  
 517  
 518  
 519  
 520  
 521  
 522  
 523

**Fig. S11. Ordinary least squares (OLS) linear regression between species richness of described species (ln-transformed) and cryptic species (ln-transformed) among the 567 grid cells.** The result showed these two variables had a significant, positive relationship ( $r^2=0.49$ ;  $p<0.0001$ ). The regression after spatial autocorrelation also supports the significant positive relationship (estimates=0.46, z value= 5.15,  $p<0.0001$ ).

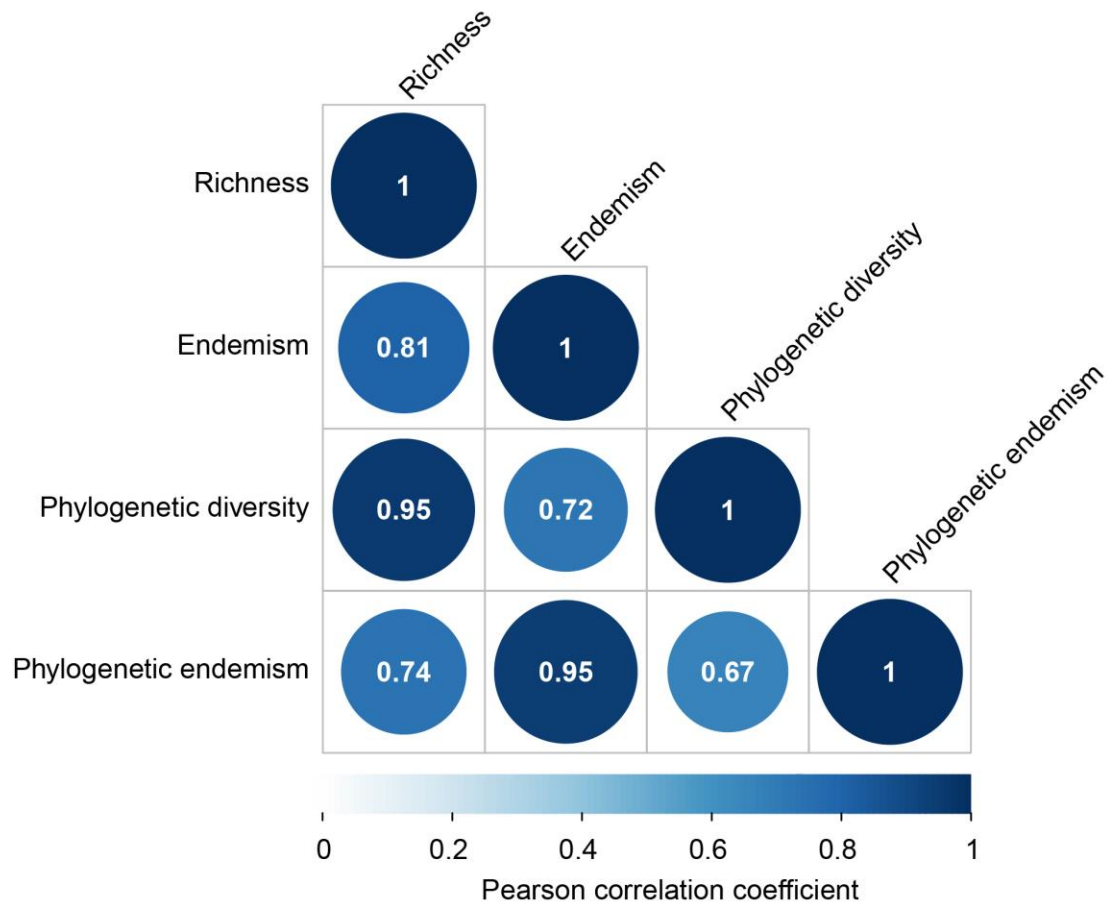

524  
525  
526  
527  
528  
529  
530

**Fig. S12. Correlations between different diversity metrics.** The Pearson correlation coefficients were calculated among grid cells for each pair of variables: species richness, endemism, phylogenetic diversity, and phylogenetic endemism. Darker blues indicate stronger correlations.

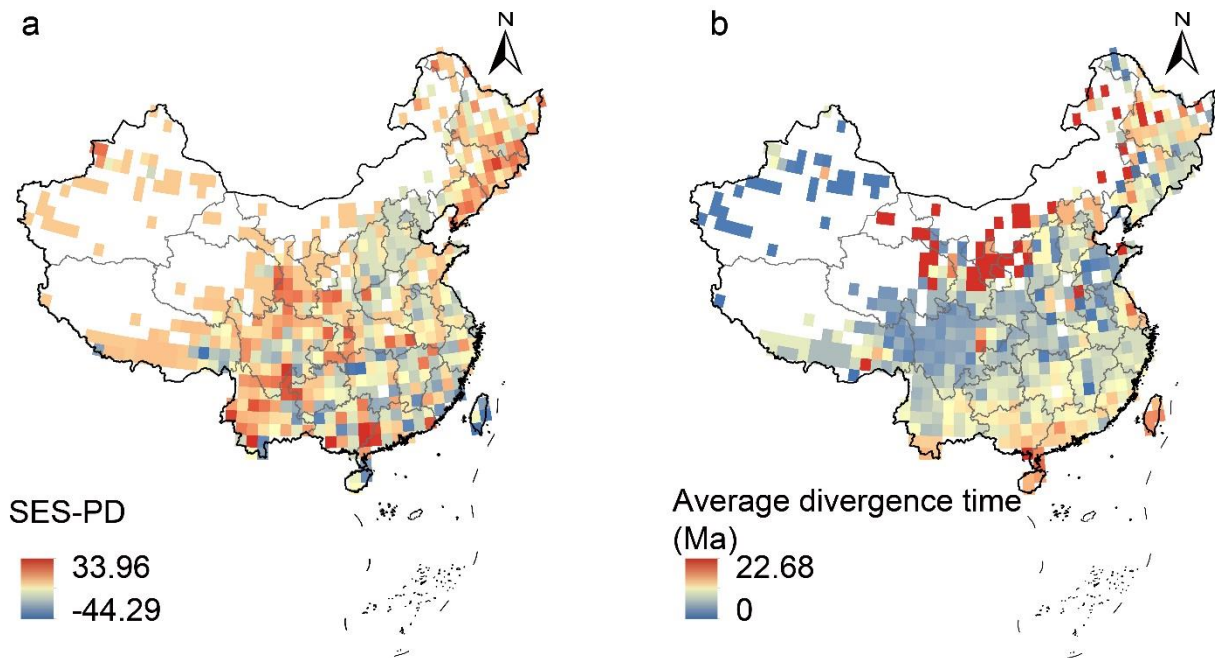

532

533

534

535

536

537

538

539

540

541

542

543

544

545

546

547

548

549

550

551

552

553

**Fig. S13. Distribution among grid cells of (a) standardized phylogenetic diversity (SES-PD) and (b) average divergence time of species.** SES-PD accounts for phylogenetic diversity while controlling for species richness. Higher values are indicated by darker red. The gray lines indicate the provincial boundaries of China. The average divergence time was computed as the mean value of divergence times across all species within each grid cell. To estimate this, we utilized the R package *phytools* (52). Specifically, we extracted the divergence time of each species (i.e., the time when they diverged from their sister taxon) in each grid cell, regardless of whether the sister taxon was in that grid cell. Subsequently, we summed the divergence times of all species within each grid cell and calculated the average divergence time by dividing the summed time by the species richness of that grid cell. In cases where a grid cell contained only one species, the average divergence time corresponded to the divergence time of that species. A regression analysis showed no significant relationship between these variables among grid cells ( $r^2 < 0.01$ ;  $p = 0.191$ ). Analysis after correcting for spatial autocorrelation also supports the nonsignificant relationship (estimates = -0.09, z value = 6.24,  $p = 0.238$ ). This overall result indicates that while some high-value grid cells for SES-PD and average divergence time overlap (e.g., northern China), grid cells with significantly higher SES-PD do not necessarily contain older species. Note that we did not consider either of these variables (SES-PD, mean divergence time) when delimiting hotspots, since both appear to be largely decoupled from species richness (SES-PD:  $r^2 = 0.03$ ;  $p < 0.001$ ; mean divergence time:  $r^2 < 0.01$ ;  $p = 0.795$ ), and our primary focus was on species richness.



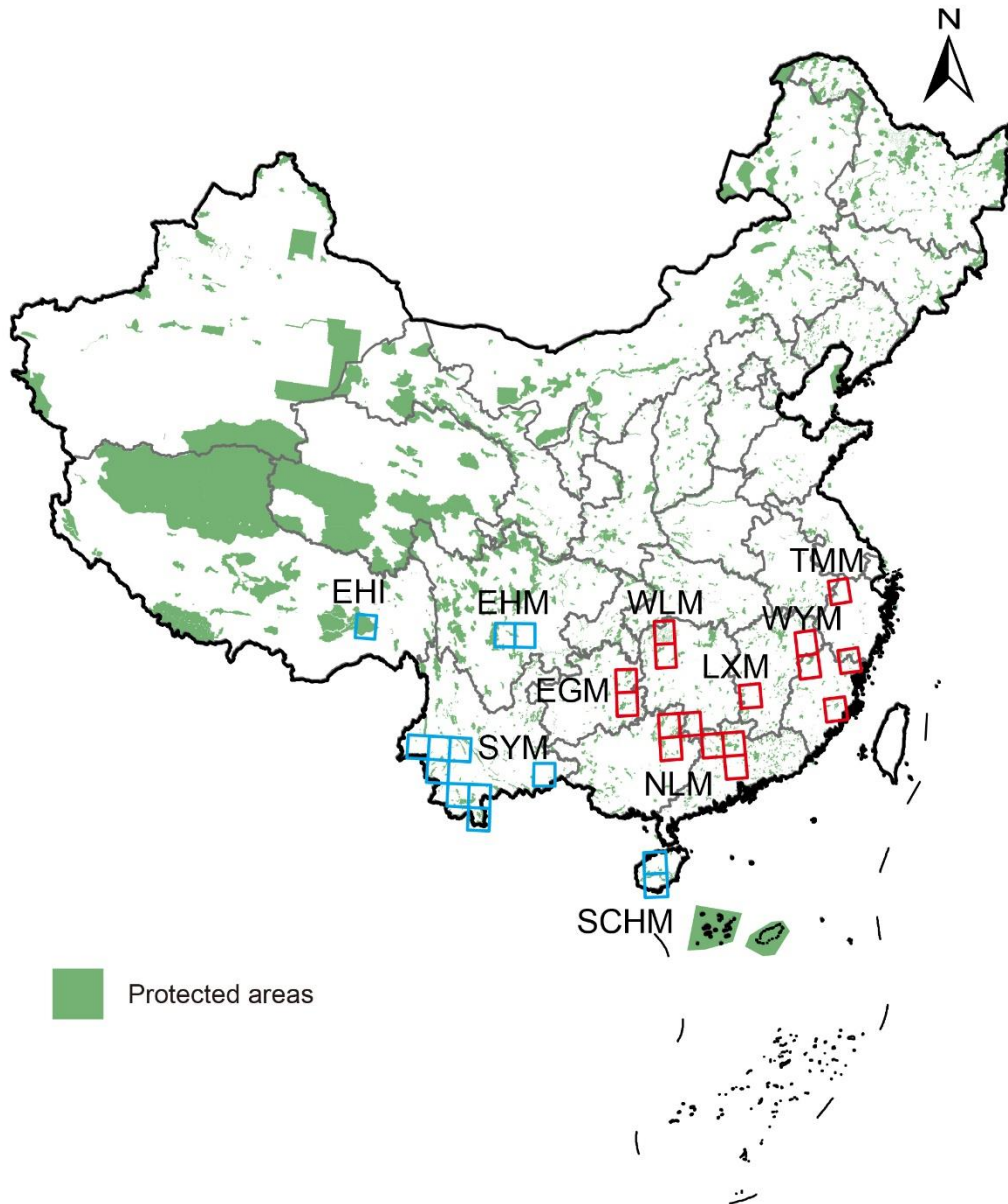

554  
555

556 **Fig. S14. Protected areas in China (green) and the location of the ten hotspots identified for**  
 557 **Chinese amphibians.** Grid cells corresponding to the six new hotspots are shown in red. Grid  
 558 cells corresponding to the four old hotspots are shown in blue. Abbreviations for hotspots: EHI:  
 559 Eastern Himalayas, EHM: Eastern Hengduan Mountains, SYM: Southwest Yunnan Mountains,  
 560 SCHM: South-Central Hainan Mountains, NLM: Nanling Mountains, WLM: Wuling Mountains,  
 561 EGM: Eastern Guizhou Mountains, LXM: Luoxiao Mountains, WYM: Wuyi Mountains, TMM:  
 562 Tianmu Mountains. The gray lines indicate the provincial boundaries of China.

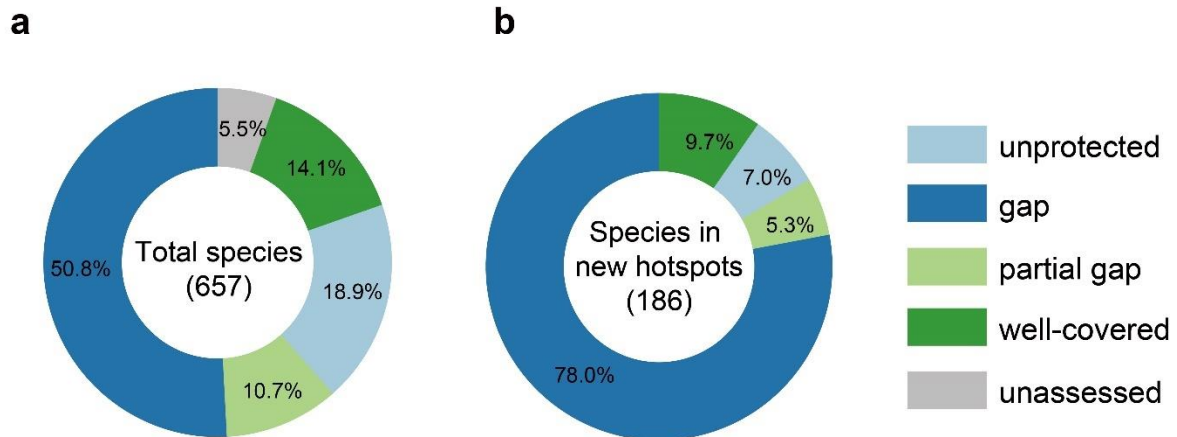

564

565

**Fig. S15. The proportion of the geographic range of each species that is within protected areas.** Based on the percentage of each species' range that fell inside the protected areas, we classified species into four groups: (i) unprotected: species' range was completely outside protected areas; (ii) gap: maximum of 20% covered by protected areas; (iii) partial gap: 21–90% covered by protected areas; and (iv) well-covered: >90% covered by protected areas. Species without distribution data were not assessed. Species with occurrences only in Hongkong, Macao, or Taiwan were also not assessed because of the lack of protected areas in this dataset.

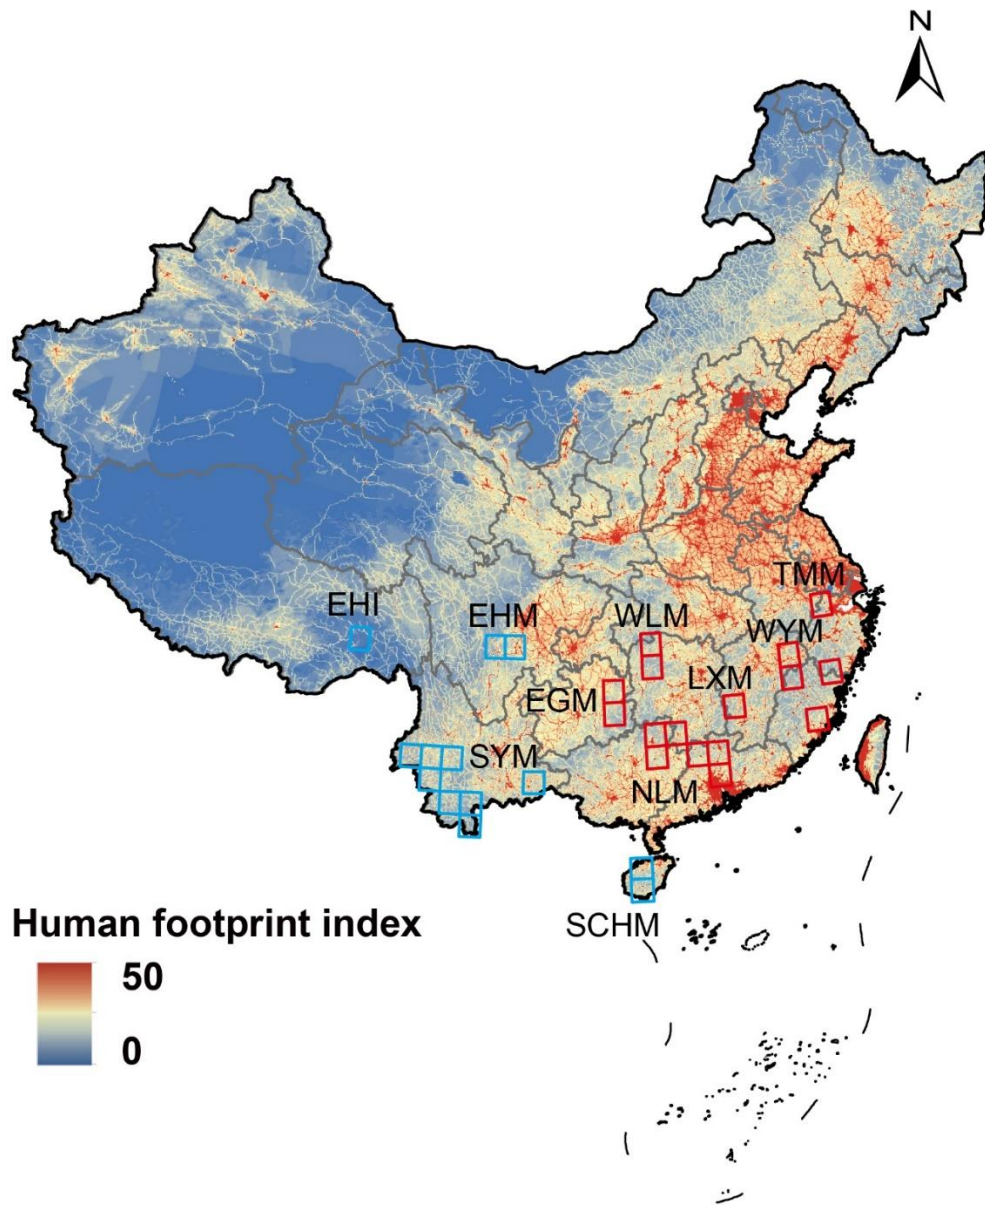

Human footprint index

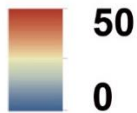

573  
 574 **Fig. S16. Map of human footprint index and the location of the ten amphibian hotspots.**  
 575 Red corresponds to high human pressure, blue to low human pressure. Grid cells corresponding  
 576 to the six new hotspots are shown in red. Grid cells corresponding to the four old hotspots are  
 577 shown in blue. Abbreviations for hotspots: EHI: Eastern Himalayas, EHM: Eastern Hengduan  
 578 Mountains, SYM: Southwest Yunnan Mountains, SCHM: South-Central Hainan Mountains,  
 579 NLM: Nanling Mountains, WLM: Wuling Mountains, EGM: Eastern Guizhou Mountains, LXM:  
 580 Luoxiao Mountains, WYM: Wuyi Mountains, TMM: Tianmu Mountains. The gray lines indicate  
 581 the provincial boundaries of China.

582

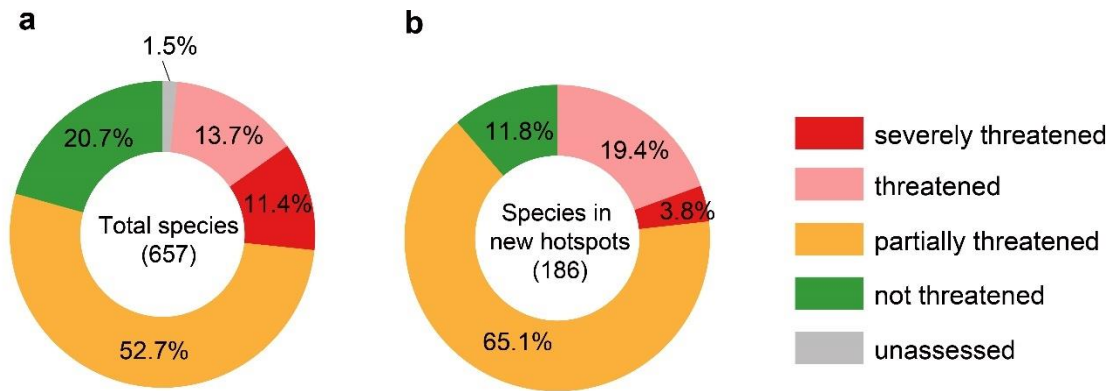

583

584

585 **Fig. S17. Distribution of species in areas of high human pressure, for all species and those**

586 **in the new hotspots.** Species without distribution data were not assessed. Based on the

587 percentage of each species' range that fell inside the high-human pressure areas, we classified

588 species into four groups: (i) severely threatened: species' range was completely inside the very

589 high-human pressure areas (100%); (ii) threatened: >50% in the very high-pressure areas;

590 partially threatened:  $\leq 50\%$  and  $>0\%$ , and (iv) non-threatened: completely outside the very high-

591 pressure areas.

592  
593  
594  
595  
596  
597  
598  
599

**Tables S1–S5**

**Table S1.** Summary of diversity statistics for each grid cell located in the ten hotspots. Lon=longitude of the centroid of each hotspot grid cell. Lat=latitude of the centroid of each hotspot grid cell. A “Top 5%” indicates that the total richness, endemism, phylogenetic diversity (PD), or phylogenetic endemism (PE) of this grid cell is in the upper 95<sup>th</sup> percentile among all 567 cells. Data for each grid cell is given in External Dataset S8.

| <b>Lon</b> | <b>Lat</b> | <b>Hotspots</b>                | <b>Richness</b> | <b>Endemism</b> | <b>PD</b> | <b>PE</b> |
|------------|------------|--------------------------------|-----------------|-----------------|-----------|-----------|
| 110.5      | 25.5       | Nanling Mountains              | Top 5%          | Top 5%          | Top 5%    | Top 5%    |
| 110.5      | 24.5       | Nanling Mountains              | Top 5%          | Top 5%          | Top 5%    | Top 5%    |
| 112.5      | 24.5       | Nanling Mountains              | Top 5%          |                 | Top 5%    |           |
| 113.5      | 24.5       | Nanling Mountains              | Top 5%          | Top 5%          | Top 5%    | Top 5%    |
| 111.5      | 25.5       | Nanling Mountains              | Top 5%          |                 |           |           |
| 113.5      | 23.5       | Nanling Mountains              | Top 5%          |                 | Top 5%    |           |
| 108.5      | 26.5       | Eastern Guizhou Mountains      | Top 5%          | Top 5%          | Top 5%    |           |
| 108.5      | 27.5       | Eastern Guizhou Mountains      | Top 5%          |                 | Top 5%    |           |
| 114.5      | 26.5       | Luoxiao Mountains              | Top 5%          | Top 5%          | Top 5%    |           |
| 119.5      | 30.5       | Tianmu Mountains               | Top 5%          |                 | Top 5%    |           |
| 110.5      | 29.5       | Wuling Mountains               | Top 5%          |                 | Top 5%    |           |
| 110.5      | 28.5       | Wuling Mountains               | Top 5%          |                 |           |           |
| 117.5      | 27.5       | Wuyi Mountains                 | Top 5%          |                 | Top 5%    |           |
| 119.5      | 27.5       | Wuyi Mountains                 | Top 5%          |                 | Top 5%    |           |
| 118.5      | 25.5       | Wuyi Mountains                 | Top 5%          |                 |           |           |
| 117.5      | 28.5       | Wuyi Mountains                 | Top 5%          |                 |           |           |
| 103.5      | 29.5       | Eastern Hengdian Mountains     | Top 5%          | Top 5%          | Top 5%    | Top 5%    |
| 102.5      | 29.5       | Eastern Hengdian Mountains     | Top 5%          | Top 5%          |           |           |
| 95.5       | 29.5       | Eastern Himalaya               | Top 5%          | Top 5%          |           | Top 5%    |
| 109.5      | 18.5       | South-Central Hainan Mountains | Top 5%          | Top 5%          | Top 5%    | Top 5%    |
| 109.5      | 19.5       | South-Central Hainan Mountains | Top 5%          | Top 5%          | Top 5%    | Top 5%    |
| 100.5      | 22.5       | Southwest Yunnan Mountains     | Top 5%          | Top 5%          | Top 5%    | Top 5%    |
| 104.5      | 23.5       | Southwest Yunnan Mountains     | Top 5%          | Top 5%          | Top 5%    | Top 5%    |
| 100.5      | 24.5       | Southwest Yunnan Mountains     | Top 5%          | Top 5%          | Top 5%    | Top 5%    |
| 99.5       | 23.5       | Southwest Yunnan Mountains     | Top 5%          | Top 5%          | Top 5%    | Top 5%    |
| 101.5      | 21.5       | Southwest Yunnan Mountains     | Top 5%          | Top 5%          |           | Top 5%    |
| 98.5       | 24.5       | Southwest Yunnan Mountains     | Top 5%          | Top 5%          | Top 5%    | Top 5%    |
| 101.5      | 22.5       | Southwest Yunnan Mountains     | Top 5%          | Top 5%          |           | Top 5%    |
| 99.5       | 24.5       | Southwest Yunnan Mountains     | Top 5%          | Top 5%          | Top 5%    | Top 5%    |

600

601 **Table S2.** Summary of the proportion of protected areas and human pressures for each grid  
602 located in the ten hotspots. Lon=longitude of the centroid of each hotspot grid cell. Lat=latitude  
603 of the centroid of each hotspot grid cell. Values for the human footprint index are based on an  
604 average across ~1 km grid cells within each ~111x111 km grid cell. We followed classification  
605 of human pressure level from Venter et al. (53): no pressure, mean human footprint=0; low  
606 pressure, human footprint=1–2; moderate pressure, human footprint=3–5; high pressure, human  
607 footprint=6–11; and very high pressure, human footprint>12.  
608

| Lon   | Lat  | Hotspots                       | Proportion of protected areas | Human footprint index | Human pressure level |
|-------|------|--------------------------------|-------------------------------|-----------------------|----------------------|
| 110.5 | 25.5 | Nanling Mountains              | 11.14%                        | 7.25                  | high pressure        |
| 110.5 | 24.5 | Nanling Mountains              | 11.11%                        | 7.30                  | high pressure        |
| 113.5 | 24.5 | Nanling Mountains              | 17.57%                        | 10.26                 | high pressure        |
| 111.5 | 25.5 | Nanling Mountains              | 5.87%                         | 11.26                 | high pressure        |
| 112.5 | 24.5 | Nanling Mountains              | 11.53%                        | 14.00                 | very high pressure   |
| 113.5 | 23.5 | Nanling Mountains              | 1.96%                         | 18.85                 | very high pressure   |
| 108.5 | 26.5 | Eastern Guizhou Mountains      | 8.35%                         | 7.30                  | high pressure        |
| 108.5 | 27.5 | Eastern Guizhou Mountains      | 10.87%                        | 9.25                  | high pressure        |
| 114.5 | 26.5 | Luoxiao Mountains              | 6.78%                         | 7.25                  | high pressure        |
| 119.5 | 30.5 | Tianmu Mountains               | 1.56%                         | 7.25                  | high pressure        |
| 110.5 | 28.5 | Wuling Mountains               | 8.19%                         | 6.58                  | high pressure        |
| 110.5 | 29.5 | Wuling Mountains               | 5.46%                         | 11.03                 | high pressure        |
| 117.5 | 27.5 | Wuyi Mountains                 | 10.27%                        | 6.26                  | high pressure        |
| 119.5 | 27.5 | Wuyi Mountains                 | 5.32%                         | 12.00                 | very high pressure   |
| 117.5 | 28.5 | Wuyi Mountains                 | 0.44%                         | 14.85                 | very high pressure   |
| 118.5 | 25.5 | Wuyi Mountains                 | 4.41%                         | 16.00                 | very high pressure   |
| 102.5 | 29.5 | Eastern Hengduan Mountains     | 18.12%                        | 6.32                  | high pressure        |
| 103.5 | 29.5 | Eastern Hengduan Mountains     | 2.09%                         | 18.75                 | very high pressure   |
| 95.5  | 29.5 | Eastern Himalaya               | 61.66%                        | 1.59                  | low pressure         |
| 109.5 | 18.5 | South-Central Hainan Mountains | 8.88%                         | 11.50                 | high pressure        |
| 109.5 | 19.5 | South-Central Hainan Mountains | 7.35%                         | 13.23                 | very high pressure   |
| 100.5 | 22.5 | Southwest Yunnan Mountains     | 11.41%                        | 5.46                  | moderate pressure    |
| 98.5  | 24.5 | Southwest Yunnan Mountains     | 1.43%                         | 6.37                  | high pressure        |
| 99.5  | 24.5 | Southwest Yunnan Mountains     | 4.10%                         | 7.25                  | high pressure        |
| 100.5 | 24.5 | Southwest Yunnan Mountains     | 7.84%                         | 7.75                  | high pressure        |
| 101.5 | 21.5 | Southwest Yunnan Mountains     | 15.05%                        | 8.50                  | high pressure        |
| 104.5 | 23.5 | Southwest Yunnan Mountains     | 1.51%                         | 9.23                  | high pressure        |
| 99.5  | 23.5 | Southwest Yunnan Mountains     | 8.79%                         | 10.32                 | high pressure        |
| 101.5 | 22.5 | Southwest Yunnan Mountains     | 9.17%                         | 13.00                 | very high pressure   |

609

610 **Table S3.** The optimal partitioning scheme and best-fit model determined by IQ-TREE for all  
611 the partitions. We provided IQ-TREE with initially defined data blocks corresponding to three  
612 codon positions for each protein-coding gene and the full length for ribosomal genes (12S and  
613 16S rRNA). Data blocks that had the same best-fit model, as determined by IQ-TREE, were  
614 grouped into the same partitions. IQ-TREE includes all commonly used DNA models, such as  
615 GTR, JC, HKY, TIM, and others. Notably, the “2” in TIM2 refers to an extension of the TIM  
616 model that explicitly models AC=AT, CG=GT, and unequal base frequencies. The “e” in TIMe  
617 denotes a similar model as TIM but with equal base frequencies. "F" indicates empirical base  
618 frequencies. "I" refers to the inclusion of invariant sites in the substitution model. "G" refers to  
619 the inclusion of a gamma distribution of rates among sites in the substitution model. "R"  
620 indicates a model that generalizes the G model by relaxing the assumption of gamma-distributed  
621 rates. This free-rate model typically fits the data better than the G model and is recommended for  
622 analysis of large data sets (54). The number associated with G (e.g., G4) specifies the number of  
623 rate categories in the gamma distribution and was determined automatically by IQ-TREE. A  
624 higher number of rate categories allows for a more fine-grained description of rate variation  
625 among sites. The number associated with “R” specifies the number of estimated base  
626 frequencies. For example, R4 means that the model estimates the base frequencies using four  
627 free parameters. ASC indicates the ascertainment bias correction model.  
628

| <b>Partition</b>          | <b>Best-fit model</b> |
|---------------------------|-----------------------|
| 12S rRNA, 16S rRNA        | GTR+F+R10             |
| bdnf_codon1, pomc_codon3  | TIM2+F+I+G4           |
| bdnf_codon2               | K2P+R3                |
| bdnf_codon3               | TIM2e+R4              |
| cmyc_codon1               | TIMe+I+G4             |
| cmyc_codon2               | HKY+F+I+G4            |
| cmyc_codon3               | GTR+F+G4              |
| coi_codon1                | GTR+F+R9              |
| cxcr4_codon2, rhod_codon2 | TVM+F+R4              |
| coi_codon2                | K3Pu+F+R4             |
| coi_codon3                | TIM2+F+R7             |
| cxcr4_codon1              | TVMe+I+G4             |
| cxcr4_codon3, h3a_codon1  | GTR+F+I+G4            |
| cytb_codon1, nd1_codon1   | SYM+R7                |
| cytb_codon2               | GTR+F+R5              |
| nd2_codon3, rag1_codon2   | GTR+F+R6              |
| cytb_codon3               | GTR+F+R7              |
| h3a_codon2                | JC+R2                 |
| h3a_codon3, rag2_codon2   | TVM+F+G4              |
| ncx1_codon1, slc8a_codon1 | GTR+F+R4              |
| ncx1_codon2               | TVM+F+R3              |
| ncx1_codon3, pomc_codon1  | TVM+F+I+G4            |
| nd1_codon2                | TVM+F+R6              |

|                                      |             |
|--------------------------------------|-------------|
| nd1_codon3                           | TIM2+F+R8   |
| nd2_codon1                           | TIM2+F+R6   |
| nd2_codon2                           | GTR+F+R8    |
| nd3_codon1                           | TIM2+F+R5   |
| tyr_codon1, rhod_codon1              | SYM+I+G4    |
| nd3_codon2                           | TPM2+F+R5   |
| pomc_codon2, rag2_codon3, nd3_codon3 | TIM3+F+I+G4 |
| rag1_codon1                          | TVMe+R5     |
| rag1_codon3                          | K3Pu+F+I+G4 |
| rhod_codon3                          | TIM2+F+G4   |
| rag2_codon1                          | TIM2e+G4    |
| sia_codon1                           | SYM+R3      |
| sia_codon2                           | JC          |
| sia_codon3                           | TN+F+I+G4   |
| slc8a_codon2                         | K3Pu+F+R2   |
| slc8a_codon3                         | TPM2+F+R4   |
| tyr_codon2                           | SYM+R4      |
| tyr_codon3                           | TIM2e+R6    |

---



630 **Table S4.** Number in each category of species based on the species delimitation analyses, total  
 631 number of described species by the end of 2020, and total number of species involved in the  
 632 species delimitation analyses. The number of cryptic species is the minimum number of cryptic  
 633 species inferred among the three methods. Cryptic species retrieved from published studies  
 634 (External Dataset S2) were also included here.  
 635

| Family            | Species identification suggestions |       |                 | Described species | Total species |
|-------------------|------------------------------------|-------|-----------------|-------------------|---------------|
|                   | Match                              | Merge | Cryptic species |                   |               |
| Bombinatoridae    | 0                                  | 0     | 0               | 5                 | 8             |
| Bufoidea          | 9                                  | 0     | 6               | 15                | 30            |
| Ceratobatrachidae | 1                                  | 0     | 0               | 4                 | 4             |
| Dicroglossidae    | 10                                 | 0     | 3               | 38                | 80            |
| Hylidae           | 2                                  | 1     | 0               | 8                 | 20            |
| Hynobiidae        | 11                                 | 0     | 0               | 28                | 42            |
| Ichthyophiidae    | 1                                  | 0     | 0               | 1                 | 11            |
| Megophryidae      | 94                                 | 0     | 56              | 117               | 199           |
| Microhylidae      | 3                                  | 2     | 1               | 17                | 49            |
| Ranidae           | 54                                 | 7     | 12              | 115               | 196           |
| Rhacophoridae     | 32                                 | 2     | 10              | 65                | 95            |
| Salamandridae     | 21                                 | 2     | 6               | 40                | 47            |
| Cryptobranchidae  | ---                                | ---   | 6               | ---               | ---           |

636  
 637

638  
639  
640  
641  
642

**Table S5.** Species richness of each biogeographic region delimited for Chinese amphibians. Corrected richness is the total species richness of a region divided by the number of grid cells in the region.

| <b>Biogeographic regions</b> | <b>Number of grid cells</b> | <b>Total richness</b> | <b>Corrected richness</b> |
|------------------------------|-----------------------------|-----------------------|---------------------------|
| South China                  | 195                         | 422                   | 2.2                       |
| South Yunnan Mountains       | 9                           | 105                   | 11.7                      |
| Yunnan Plateau               | 26                          | 129                   | 5.0                       |
| North China                  | 190                         | 44                    | 0.2                       |
| Qinghai-Xizang Plateau       | 68                          | 50                    | 0.7                       |
| Himalayas                    | 4                           | 40                    | 10.0                      |
| Hengduan Mountains           | 10                          | 23                    | 2.3                       |
| Northwest China              | 37                          | 5                     | 0.1                       |

643
